# Supplementary material for: Application of the Ostrom framework in the analysis of a social-ecological system with multiple resources in a marine protected area
Source: PeerJ. 2019 Aug 14;7:e7374. doi: 10.7717/peerj.7374 (PMC6698133; doi:10.7717/peerj.7374)
Supplement: Supplemental Information 1 [file peerj-07-7374-s001.xlsx]

## Sheet: Fly Fishing
	ECONOMIC DATA RAW FILES
	Trips					2	1200
	Total	Month	Fishing trips	%trips	Trips/6 days avg	Anglers/month	Average Angler
	350	Ene	350	0.0139942	58.3333	116.667	16.793
	558	Feb	558	0.0562682	93	186	67.5219
	611	Mar	611	0.0183673	101.833	203.667	22.0408
	602	Abr	602	0.102041	100.333	200.667	122.449
	398	May	398	0.162682	66.3333	132.667	195.219
	302	Jun	302	0.178134	50.3333	100.667	213.761
	200	Jul	200	0.17551	33.3333	66.6667	210.612
	90	Ago	90	0.116035	15	30	139.242
	15	Sep	15	0.0880466	2.5	5	105.656
	48	Oct	48	0.058309	8	16	69.9708
	193	Nov	193	0.0262391	32.1667	64.3333	31.4869
	63	Dic	63	0.00437318	10.5	21	5.24781
	3430		3430		571.667	1143.33	1200
	Boat services	Price	180	usd
				Ftrips * Prices+Tip
	Fishing trips	Guide Service per boat	Tips (avg)	Income
	3430	180	35	737450
	Trips	2016			2016	2014	2015	2016	2017
	Lodge 1	Lodge 2	Lodge3	Lodge 4	Lodge 1	Lodge 5	Lodge 2	Lodge4	Lodge5
January	86	15	2	6	160		36	34	11
February	136	11	5	3	180		102	121
March	126	46		1	300		69	69
April	157	37		1	300		65	42
May	150	40			150		38	20
June	120				160			22
July	40				160
August	30				60
September	5				0	10
October	10				20		18
November	26			4	0		101	62
December	10			1	0	18	23	11

## Sheet: Boat Tours
	Partners	Boats
Cooperative 1	43	24									For 2016
Cooperative 2	23	15									boat 6 pax = $2500
Other	14								All coop.		18.47	exchange rate 2016
									Multiplie factor	6/pax	135.355	USD/bote
	Cooperative 1			Cooperative 2				Pax/month	2	6	$/bote USD
	2015	2016	2017	2015	2016		Month	Avg	Total Pax	tourist	Income avg
January	227	289	416	308	165		ene	281	561	3366	75933.9
February	204	319	421	286	206		feb	287.2	574.4	3446.4	77747.7
March	219	337	413	336	181		mar	297.2	594.4	3566.4	80454.8
April	220	336	433	329	250		abr	313.6	627.2	3764	84894.4
May	226	398	432	300	167		may	290.5	597	3582	80806.7
June	221				320		jun	287	605	3630	81889.6
July	227				324		jul	275.5	550	3300	74445
August	227				357		ago	292	584	3504	79047.1
September	293				192		sep	242.5	580	3480	78505.7
October	256				165		oct	210.5	543	3258	73497.6
November	293				167		nov	230	500	3000	67677.3
December	335				172		dic	253.5	508	3048	68760.2
							Sum	3260.5	6824	40944.8	923660
										Avg month	76971.7
										S.D.	5173.38
										Coef. Var	0.0672115

## Sheet: Lobster Fishery
Lobster cooperative
69 fishing fields
		1000		15 usd/kg
Season	Income USD	Catch ton	CPUE (kg/trip)	Income MXP	MXP $200 kg
2006-2007	533281	43.2764	13.5186	7.99922e+06	8655.27
2007-2008	1.19063e+06	85.671	18.4071	1.78594e+07	17134.2	14.9443
2008-2009	1.14851e+06	83.7514	20.1222	1.72277e+07	16750.3	14.5269
2009-2010	922314	71.5319	18.6611	1.38347e+07	14306.4	12.4397
2010-2011	1.46711e+06	102.163	20.6304	2.20066e+07	20432.6	17.8247
2011-2012	1.08615e+06	77.3278	18.464	1.62922e+07	15465.6	13.3998
2012-2013	1.23094e+06	88.9807	20.7586	1.84641e+07	17796.1	19.6197
2013-2014	1.28257e+06	90.7723	23.3027	1.92386e+07	18154.5	15.7792
2014-2015	624959	42.7222	17.1466	9.37438e+06	8544.44	7.43044
2015-2016	985401	67.0849	23.3347	1.4781e+07	13417	14.026
Avg	1.04719e+06	75.3282	19.4346	1.57078e+07	15065.6
Est. Dev.	290527	19.7197	2.91849
Coef.Var.	0.277436	0.261783	0.15017
