# Supplementary material for: Application of the Ostrom framework in the analysis of a social-ecological system with multiple resources in a marine protected area
Source: PeerJ. 2019 Aug 14;7:e7374. doi: 10.7717/peerj.7374 (PMC6698133; doi:10.7717/peerj.7374)
Supplement: Supplemental Information 4 [file peerj-07-7374-s004.xlsx]

## Sheet: Survey guides
	SURVEY FLY FISHING GUIDES RAW DATA								Angler preferences				MXN	MXN	Mxn		Mxn		Mxn	Mxn	Mxn		Perception	Perception	Perception
Date	Name	Age	Partner Coop	Experience yr	Alternative Act	Boat owner	Days at year	%PERMIT	%Bonefish	%Tarpon	%Snook	Lodges num	License cost	Cooperative Quote	Gas	Engine maintenance	Engine costs	Boat maintenance	Boat costs	Income per day avg	Annual income	Anglers demand	Boat crowding, over-crowded boats	Quality of fishing	Ecosystem quality	Shelter externalities
2016-04-20	Guide 1	28	no	8	Tour	0	100	100				1		65000	35	Monthly	1600	2 per year	17000	3350	100000	Increased	in equilibrium	same	deteriorated	No
2016-04-20	Guide 2	36	yes	12	Lobster	0	120	100				1		65000	30	Monthly	2500	cada 4 años		3000	45000	same	maximum capacity	Decreased	conserved	No
2016-04-20	Guide 3	43	yes	24	Lobster	1	90	100				2	10360	65000	30	Monthly	1000	every 3 years	7000	2300	270000	Increased	maximum capacity	same	conserved	No
2016-04-20	Guide 4	40	yes	18	Lobster	1	140	100				1	10360	54000	30	Monthly	1200	every 3 years	17000	2300	200000	Increased	maximum capacity	same	conserved	yes
2016-04-20	Guide 5	40	yes	18	Lobster	1	140	100				2	10360	54000	30	Monthly	1200	every 3 years	17000	2300	200000	Increased	maximum capacity	same	conserved	yes
2016-04-20	Guide 6	25	No	8	Tour and lobster	0	100	80	10	5	5	1		54000	30	4 per year	1500	annually	5000	3350	70000	Increased	maximum capacity	Decreased	deteriorated	no
2016-04-20	Guide 7	34	yes	2	Lobster	0	100	80	15	2.5	2.5	2	2500	65000	30	Monthly	1200	every 2 years	3000	3300	40000	Increased	maximum capacity	same	deteriorated	No
2016-04-20	Guide 8	39	yes	20	Lobster	1	100	90	9	0.5	0.5	1	1500	65000	40	Monthly	2000	every 2 years	5000	3250	100000	Increased	maximum capacity	same	conserved	yes
2016-03-15	Guide 9	33	no	10	Lobster	0	100	90	10			1		65000	40	Monthly	1600		17000		70000	same	in equilibrium	same	conserved	yes
2016-03-15	Guide 10	30	yes	15	tour	0	150	50	40	5	5	3	600	65000	40	Monthly	1600	annually		3500	60000	Increased	maximum capacity	same	conserved	yes
2017-01-19	Guide 11	24	NO	8	Tour	no	120	80	20			2	600	65000	50	Monthly		annually			70000	same	maximum capacity	same	deteriorated
2017-01-19	Guide 12	36	no	13	Tour and lobster	0	110	95	5			1		65000	35	4 per year	2500	every 2 years	7000		120000	Increased	in equilibrium	same	conserved	no
2017-01-19	Guide 13	27	no	1	tour	1	100	100				1		65000	35	4 per year	2500	every 2 years	7000		100000	Increased	maximum capacity	same	conserved
2017-05-14	Guide 14	27	no	8	Tour	0	133	30	60	0.05	5	2		65000		4 per year					60000	Increased	maximum capacity	Incresed	deteriorated	yes
2017-05-13	Guide 15	38	no	2	tour	0	120	75	10	0.1	5	2	10360	65000		Monthly	1600	annually			80000	Increased	maximum capacity	Incresed	conserved
2017-08-11	Guide 16	43	no	26	tour	0	140	90	3	3	3	2				Monthly	2500	every 3 years	17000		60000	Decreased	maximum capacity	same	deteriorated	yes
2017-08-11	Guide 17	26	yes	10	tour	1	100	90	10			2				Monthly	1600				90000	Increased	maximum capacity	same	deteriorated	yes
2016-03-15	Guide 18	40	yes	18	Lobster	1	140	90	10			1	10360	60000	40	Monthly	2500		8000		125000	Increased	maximum capacity	same	conserved
2016-04-20	Guide 19	43	No	12	Tour and lobster	0	100	80	10	3	5	2	10360	60000	30	Monthly		annually	5000	3350	70000	Increased	maximum capacity	same	deteriorated	yes
2016-03-15	Guide 20	23	yes	8	Lobster	0	140	90	10			2		60000	40	4 per year	1600	every 3 years	5000		90000	same	maximum capacity	Incresed	conserved
2017-01-19	Guide 21	32	NO	16	Tour	1	110	100				1	10360	60000	50	Monthly	2500	annually		3600	1000	same	maximum capacity	same	deteriorated
2017-05-14	22	27	no	8	Tour	0	133	30	60	0.05	5	2		65000		4 per year					60000	Increased	maximum capacity	Incresed	deteriorated	yes
