# Supplementary material for: Application of the Ostrom framework in the analysis of a social-ecological system with multiple resources in a marine protected area
Source: PeerJ. 2019 Aug 14;7:e7374. doi: 10.7717/peerj.7374 (PMC6698133; doi:10.7717/peerj.7374)
Supplement: Supplemental Information 6 [file peerj-07-7374-s006.xlsx]

## Sheet: Survey data
		SURVEY FLY FISHING ANGLERS RAW DATA
Number	Gender	Age	Educ	Ocupation	Since	Trips_yr	Fishing_dy	Skill	Fisherman_yr	Days_for_fish	Permit	Quality	TTC	Trav_Time	Travel_cost	AIP_Cost	Income	TC_Fdy	AIP_dy
5	0	55	1	2	2	1	3	2	38	180	0	3	3450	11	750	1800	124500	1150	600
17	1	45	3	2	1	1	3	2	20	20	0	1	4500	10	1000	2500	124500	1500	833.333
38	1	17	1	1	1	1	3	2	5	15	1	3	4140	9	840	3000	124500	1380	1000
39	1	21	1	1	1	1	3	2	7	21	1	3	4140	9	840	3000	124500	1380	1000
54	1	66	2	3	6	1	3	2	60	160	1	3	3650	10	600	2900	124500	1216.67	966.667
63	1	45	3	2	1	1	3	2	20	20	1	3	3650	10	1000	2500	124500	1216.67	833.333
3	1	65	1	3	2	2	3	3	45	60	1	3	3771	6	271	2500	174500	1257	833.333
26	1	44	3	2	1	1	3	2	26	40	1	2	1740	11	600	1000	224500	580	333.333
40	1	45	4	2	1	1	4	3	30	15	1	3	3400	12	500	2500	124500	850	625
16	1	59	4	2	6	1	4	2	40	20	1	3	3700	12	800	2700	224500	925	675
44	1	50	4	2	1	1	4	2	15	15	1	3	5250	9	450	4200	224500	1312.5	1050
51	1	49	1	2	3	1	4	2	17	15	1	3	2750	12	700	1200	224500	687.5	300
62	1	59	4	2	5	1	4	2	40	20	1	2	3700	12	800	2700	224500	925	675
67	1	60	4	2	1	1	4	2	30	100	1	2	5500	8	1000	4000	224500	1375	1000
70	1	56	4	2	2	2	4	2	20	15	1	2	4990	6	490	4000	224500	1247.5	1000
76	1	38	4	2	10	3	4	3	20	40	1	1	6000	9	1000	4000	224500	1500	1000
49	1	43	4	2	16	5	5	3	30	150	1	2	5000	15	1000	3000	124500	1000	600
53	1	47	2	2	7	2	5	2	25	60	1	2	4150	10	850	2800	174500	830	560
14	1	73	3	2	20	1	6	3	45	42	0	3	6010	10	490	5220	45000	1001.67	870
27	1	32	3	2	3	1	6	3	15	70	1	3	4110	14	610	3200	45000	685	533.333
9	1	38	2	2	4	1	6	2	12	20	0	3	4010	12	480	3250	65000	668.333	541.667
21	1	69	4	3	4	2	6	2	30	200	1	1	6050	12	700	5000	65000	1008.33	833.333
23	1	76	4	3	9	2	6	2	60	105	1	3	4840	16	560	4000	85000	806.667	666.667
28	1	26	3	2	1	1	6	2	26	70	1	2	4950	18	1100	3200	85000	825	533.333
34	1	44	3	2	2	1	6	2	20	100	1	2	5250	10	700	4200	85000	875	700
41	1	32	3	2	1	1	6	2	20	40	1	3	4350	14	700	3200	85000	725	533.333
42	0	31	4	2	1	1	6	2	31	365	1	3	4350	14	700	3200	85000	725	533.333
43	1	58	4	2	2	1	6	2	52	84	1	3	4900	14	1100	3200	85000	816.667	533.333
69	1	31	3	1	6	2	6	3	25	150	1	2	5500	12	1000	4000	85000	916.667	666.667
78	1	45	3	2	4	2	6	3	30	40	1	2	5500	6	800	4000	85000	916.667	666.667
89	1	52	3	2	5	3	6	3	25	50	1	2	6000	8	1000	4000	85000	1000	666.667
93	1	48	4	2	1	1	6	3	20	40	1	1	5700	7	1200	4000	85000	950	666.667
94	1	36	3	2	6	1	6	3	30	50	1	1	5650	8	650	4000	85000	941.667	666.667
95	1	40	4	2	12	2	6	3	30	60	1	2	4650	8	650	3000	85000	775	500
97	1	33	3	2	1	1	6	3	20	50	1	1	5750	9	750	4000	85000	958.333	666.667
6	1	49	4	2	6	1	6	2	25	7	0	3	4575	10	675	3500	124500	762.5	583.333
22	1	71	3	3	12	2	6	3	60	150	1	2	5990	24	640	5000	124500	998.333	833.333
24	1	76	4	3	8	1	6	2	20	40	1	2	5325	12	825	4200	124500	887.5	700
32	1	36	3	2	6	2	6	3	20	100	1	2	5190	9	840	3600	124500	865	600
35	1	34	3	2	6	1	6	3	15	50	1	3	6240	9	840	4200	124500	1040	700
36	1	28	1	2	1	1	6	3	25	200	0	3	5220	12	640	4250	124500	870	708.333
12	1	66	3	2	1	1	6	2	7	20	0	2	5740	10	490	5000	174500	956.667	833.333
13	1	61	1	2	1	1	6	1	42	20	0	2	5590	12	490	5000	174500	931.667	833.333
15	1	58	4	2	2	1	6	2	33	30	0	3	5200	10	1000	4000	174500	866.667	666.667
48	1	30	3	2	5	2	6	2	20	200	1	3	4150	9	550	3200	174500	691.667	533.333
57	1	46	3	2	4	2	6	3	40	100	1	2	4300	9	700	3000	174500	716.667	500
61	1	58	4	2	1	1	6	2	40	30	1	2	5200	10	1000	4000	174500	866.667	666.667
64	1	43	3	2	3	1	6	2	20	30	1	3	6000	10	700	5000	174500	1000	833.333
66	1	61	4	2	12	1	6	3	40	100	1	1	5000	6	500	4000	174500	833.333	666.667
73	1	40	3	2	5	1	6	3	25	200	1	2	6500	20	2000	4000	174500	1083.33	666.667
74	1	63	4	2	10	1	6	3	40	100	1	2	5500	8	1000	4000	174500	916.667	666.667
81	1	62	3	2	1	1	6	2	30	40	1	2	6400	13	1400	4000	174500	1066.67	666.667
83	1	49	4	2	1	1	6	2	20	20	1	1	6500	10	1500	4000	174500	1083.33	666.667
90	1	56	4	2	1	1	6	2	12	10	1	2	6000	8	1000	4000	174500	1000	666.667
91	1	60	4	2	1	1	6	2	10	25	1	2	6000	9	1000	4000	174500	1000	666.667
92	1	40	3	2	1	1	6	2	15	20	1	1	5800	7	1200	4000	174500	966.667	666.667
96	1	62	3	2	1	1	6	2	15	20	1	1	5750	9	750	4000	174500	958.333	666.667
98	1	64	4	2	1	1	6	2	10	20	1	1	6200	13	1200	4000	174500	1033.33	666.667
20	1	72	4	3	10	1	6	2	25	45	1	3	6050	8	650	5040	224500	1008.33	840
25	1	48	3	2	1	1	6	2	10	20	1	3	5600	14	900	3800	224500	933.333	633.333
31	1	50	4	2	2	1	6	2	10	12	1	3	5600	10	700	4200	224500	933.333	700
59	1	41	1	2	5	3	6	3	20	365	1	2	5000	10	1000	3400	224500	833.333	566.667
68	1	61	4	3	6	1	6	2	40	20	1	2	5500	12	1000	4000	224500	916.667	666.667
75	1	62	4	3	10	1	6	3	40	60	1	3	6500	8	1000	4000	224500	1083.33	666.667
82	1	64	4	3	1	1	6	2	20	25	1	2	6200	7	1200	4000	224500	1033.33	666.667
50	1	59	3	1	4	2	6	3	50	150	1	3	6000	15	1500	4000	275000	1000	666.667
71	1	66	4	2	5	1	6	3	30	25	1	2	5500	11	1000	4000	275000	916.667	666.667
72	1	64	4	2	5	1	6	3	30	20	1	3	5500	11	1000	4000	275000	916.667	666.667
79	1	65	4	2	1	1	6	2	40	50	1	2	5500	9	1000	4000	275000	916.667	666.667
80	1	59	4	2	1	1	6	2	25	20	1	2	5180	6	680	4000	275000	863.333	666.667
84	1	59	4	2	10	1	6	2	35	25	1	1	6200	7	1200	4000	275000	1033.33	666.667
85	1	61	4	2	1	1	6	2	20	40	1	2	6200	7	1200	4000	275000	1033.33	666.667
86	1	56	4	2	10	2	6	2	30	40	1	2	6200	7	1200	4000	275000	1033.33	666.667
87	1	51	4	2	1	1	6	2	15	40	1	1	6200	7	1200	4000	275000	1033.33	666.667
88	1	48	4	2	1	1	6	2	20	20	1	2	6200	7	1200	4000	275000	1033.33	666.667
37	0	57	3	2	2	1	7	1	30	240	1	2	4500	14	1100	3275	45000	642.857	467.857
1	1	36	3	2	1	1	7	3	30	250	1	3	5356	8	456	3400	124500	765.143	485.714
10	1	34	4	2	1	1	7	3	25	30	1	3	4500	10	600	3400	124500	642.857	485.714
2	1	36	3	2	1	1	7	2	35	30	1	3	4680	12	680	3500	174500	668.571	500
19	1	75	4	3	20	1	7	2	65	90	1	3	5080	12	620	4220	174500	725.714	602.857
4	1	43	4	2	9	2	7	3	35	60	1	3	6834	29	1134	5000	224500	976.286	714.286
11	1	58	1	2	1	1	7	2	18	20	0	2	4690	10	490	4200	224500	670	600
52	1	75	4	3	1	1	7	3	50	42	1	3	6870	6	670	5500	224500	981.429	785.714
46	0	59	3	2	10	1	11	3	40	42	1	2	7500	14	1000	6000	124500	681.818	545.455
47	1	54	4	2	10	1	11	3	40	42	1	1	7600	14	1100	6000	124500	690.909	545.455
18	1	72	3	3	4	2	12	3	62	20	1	2	11050	8	650	10000	85000	920.833	833.333
58	1	47	2	2	7	2	12	2	35	60	1	3	10000	13	800	8000	124500	833.333	666.667
55	1	45	3	2	8	2	12	2	30	50	1	2	9500	12	1000	8000	224500	791.667	666.667
33	1	81	4	2	6	1	13	2	33	15	1	3	10040	9	840	8000	224500	772.308	615.385
29	1	38	3	2	2	1	14	3	11	200	1	3	8600	12	600	7800	224500	614.286	557.143
56	1	35	3	2	10	3	18	2	28	180	1	3	12400	12	1000	9800	224500	688.889	544.444

## Sheet: Codes
	No	Number		Code
	Gener	Gender		Man=1; Woman =0
	Age	Age		number
	Educ	Scholarship years		1=High School; 2=College, some-college, Technical; 3= Bahelor, Associate; 4=Master, Doctoral, Professional
	Ocupation	Occupation		1=student; 2=full and part time; 3= retired
	Since	Years visited Punta Alen		number
	Trips_yr	Average trips per year		number
	Fishing_dy	Fishing days per trip		number
	Skill	Skill level		1= amaterur; 1= intermediate, some exp; 3= expert
	Fisherman_yr	Angler years		number
	Days_for_fish	Fishing days per year		number
	Permit	How important is the permit for you?		0= not important; 1= important
	Quality	Ecosystem quality		1= fair, Good; 2=very good; 3=excelent
	TTC	Total trip costs		Total Travel Cost
	Trav_Time	Travel time to Punta Alen		Hours
	Travel_cost	Travle cost to Punta Alen		Travle cost USD
	AIP_Cost	All Inclusive Package_costs		Costs usd
	Income	Anual Income		Income usd
	TC_Fdy	Travel cost for Fishing days		TC/fishing days
